# Supplementary material
Source: Research Square preprint supplement (doi:10.21203/rs.3.rs-9268286/v1)
Supplement: Supplementary file 1 [file a4a34379baff45921be80229.docx]

Supplementary information

Effective Two-Level Dynamics in Confined Alkali Vapors at Telecom Wavelengths

Golan Ben-Ari2, Gilad Orr1, Eliran Talker2

1Department of Physics, Ariel University, Ariel 40700

2Department of Electrical Engineering, Ariel University, Ariel 40700, Israel

*Corresponding author: elirant@ariel.ac.il

**S1) Lindblad master equation**


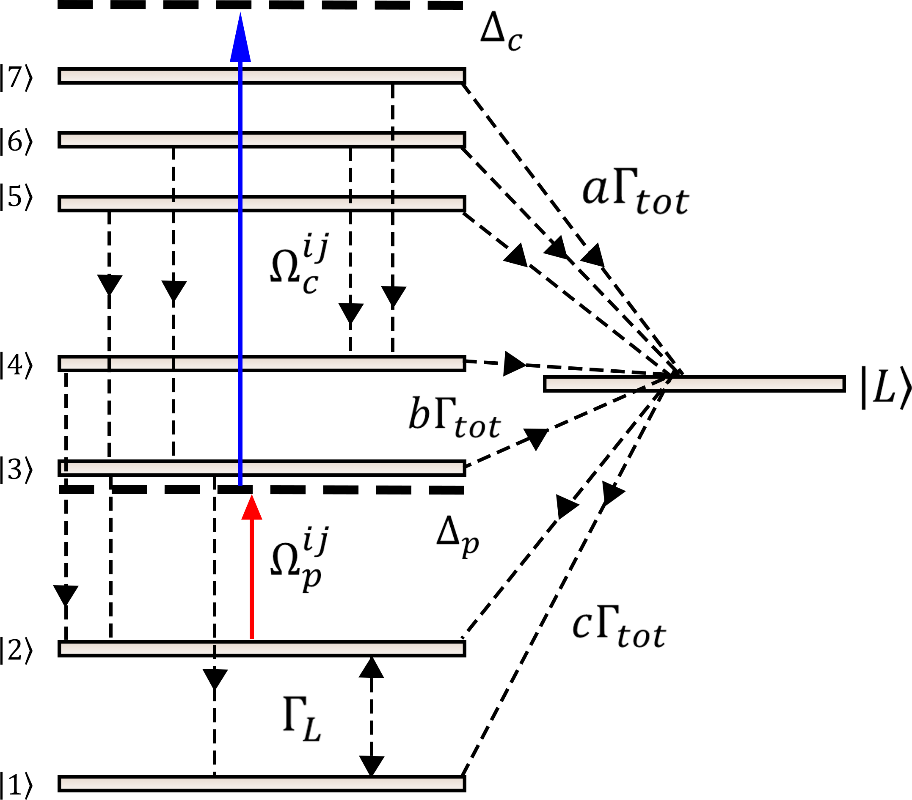


**FIG S1**. Energy-level configuration used in the theoretical model. and denote the Rabi frequencies of the probe and coupling fields, respectively, and and are their corresponding detunings. The coefficients (a), (b), and (c) represent the branching ratios from the five upper states to the ground states and to the loss state.

The master equation of our seven-level system can be described as

Here where is the unperpetrated Hamiltonian and is equal

is the detuning of the probe and the conjugate beams, is the level spacing between the adjacent levels The interaction potential can be described as

Where and . The relaxation matrix, G, in the Liouville equation given by:

The equations of motion for the population and coherence terms are

Where is the spontaneous decay from level , is the coupling Rabi frequency from level , is the coupling Rabi frequency from level ,

The DROP signal is proportional to the absorption of the probe beam and is expressed as

where is the Boltzmann velocity distribution from our thin cell. The fluorescence emitted from the manifold is given by

Where we are summing over the population density matrix elements (). Finally, the FDROP signal, corresponding to the fluorescence induced by the probe beam, is calculated as

where the summation includes the relevant intermediate and excited states. The Boltzmann velocity distribution is equals here u is the most probable velocity where m is the mass of the atoms and T their absolute temperature.

**S2) Coefficient strength factor**

Transition strength factor [1] for the transition

| F | F' |  |
| --- | --- | --- |
| 4 | 3 | 0.02 |
| 4 | 4 | 0.16 |
| 4 | 5 | 0.82 |

**S3) Microfabrication of Multichannel Ultrathin Rubidium Vapor Cells**

The vapor cell is fabricated from two glass substrates bonded by anodic bonding. The first substrate is a 50.8 mm diameter, 1.3 mm thick Borofloat 33 glass wafer patterned to define the cell geometry. A 250 nm amorphous silicon (a-Si) layer is deposited by PECVD and patterned using direct laser-writing lithography. The a-Si is etched by RIE, followed by wet etching of the exposed glass in HF:H₂O (1:10) at an etch rate of ~6 µm/h. After stripping the resist and a-Si, this process is repeated three times to form three channels with thicknesses of 8 µm, 5 µm, and 0.5 µm. The final structure consists of three 40 mm-long, 1 mm-wide channels oriented 120° apart with a common intersection. To enable anodic bonding, a second 250 nm a-Si layer is deposited and patterned using a PECVD SiO₂ hard mask, ensuring that the bonding regions remain outside the channels. In parallel, a second glass substrate is prepared by drilling a 4 mm through-hole, thinning the substrate to ~2 mm, and attaching a glass filling stem. The surface is polished to a roughness below 1.2 nm. The two substrates are anodically bonded at 350 °C under 700 V for 40 min using graphite interlayers. After bonding, the cell is baked under turbo-pumped vacuum for 48 h to reach pressures of 10⁻⁷–10⁻⁸ Torr. A droplet of natural rubidium is then introduced by condensing 85Rb vapor produced via reduction of 85RbCl with calcium, and the cell is subsequently sealed. For more information see [2]

[1] D. Steck, Rubidium 85 D line data, Physics (College Park. Md). 31 (2001).

[2] E. Talker, R. Zektzer, Y. Barash, N. Mazurski, and U. Levy, Atomic spectroscopy and laser frequency stabilization with scalable micrometer and sub-micrometer vapor cells, Journal of Vacuum Science & Technology B, Nanotechnology and Microelectronics: Materials, Processing, Measurement, and Phenomena **38**, (2020).
